# Supplementary material for: Mitochondrial Bol1 and Bol3 function as assembly factors for specific iron-sulfur proteins
Source: eLife journal article supplement (doi:10.7554/elife.16673), 2016-08-17
Supplement: supp [file elife-16673-supp-v1.zip]

D H H SxxFxxg HRxV HAL **BolA**

MTS H ETHF SxxFxxg RHRLV HAL **Bol1**

DxsxxgCg VSxxFxxgK RHRLVN H\*AF **Bol2**

MTS E DxSxGCG SxxFxxg QHRLVN HGL **Bol3**
