# Supplementary material for: Mitochondrial Bol1 and Bol3 function as assembly factors for specific iron-sulfur proteins
Source: eLife journal article supplement (doi:10.7554/elife.16673), 2016-08-17
Supplement: supp [file elife-16673-supp-v1.zip]

| Protein         | Experimental $\tau_c$ | Theoretical $\tau_c$ |
|-----------------|-----------------------|----------------------|
| Apo GLRX5       | $7.97 \pm 0.63$ ns    | 8.71 ns              |
| BOLA1           | $9.20 \pm 0.30$ ns    | 10.8 ns              |
| BOLA3           | $6.30 \pm 0.20$ ns    | 6.90 ns              |
| Apo BOLA1-GLRX5 | $16.0 \pm 1.3$ ns     | 17.2 ns              |
| Apo BOLA3-GLRX5 | $15.1 \pm 1.4$ ns     | 14.3 ns              |
