# Supplementary material for: Mitochondrial Bol1 and Bol3 function as assembly factors for specific iron-sulfur proteins
Source: eLife journal article supplement (doi:10.7554/elife.16673), 2016-08-17
Supplement: supp [file elife-16673-supp-v1.zip]

|            |             |             |            |            |             |             |            |            |            |                      |
|------------|-------------|-------------|------------|------------|-------------|-------------|------------|------------|------------|----------------------|
| Sc.Bol1    | DYKNFAFGLY  | NDSHKHKGHA  | GVQGNVSA-E | THFRIEMVSK | KFEGCLKLPQR | HRMVYSLLQD  | EMAQANG--I | HALQLSL-KT | PQEYESKAK  |                      |
| Ashbya     | DLRHFA--IY  | NDSYKHAGHA  | GMEHAANRTE | SHLRLEVSE  | QFSGMALPKR  | HRLLYTLLDD  | EIKH-HG--V | HALQLTT-RT | PEEHDRKTEA | QLG                  |
| Candida    | PL-YFK--ID  | NDSHKHAHHA  | GIRGAKNKTE | SHFRLEIVSD | VFEGKSLPAR  | HLRVYSILAN  | ELKN-DG--V | HALQMKT-KT | PEEINKTQN  |                      |
| Yarrowia   | PV-FFK--VN  | NDSHKHAHHA  | AMRGSDNTIE | SHFRLTIVSD | KFEGKSAPIR  | HRMVYKLFEE  | EMAQPNG--L | HALSLTT-KT | PKWEAELEKK |                      |
| Magnaporth | PS-RLE--IH  | NDSHLHAHHK  | AMQGSTSR-E | THFRLVVTSE | QFRSKNQPAR  | HRATYSLLKD  | EMAKEGG--I | HALQLKT-MT | PEEDERQRLK | EEEQAK               |
| Aspergill  | PS-TLI--IR  | NDSHLHAHHA  | PMQGVTSK-E | THFHVTITSS | AFQSKMQPAR  | HRMVYSLLKD  | EMSREGG--I | HALQLRT-RT | PEEEEREKIR | QSQA                 |
| Neurospora | PR-TLQ--IH  | NDSHLHAHHS  | AMRGVTSR-E | THFRVVISSD | AFKRKMQPAR  | HLRVYGLLKD  | EMAKEGG--I | HALQLRT-MT | LEEEDKRRDK | EEAEERARTC KD        |
| Schizosacc | TDKIT---LY  | NDSYKHSHHI  | AMKGVPTDNE | THFRLEIVSP | EFSGMSRVAR  | HLRVYGLLKD  | efd--GG--L | HALQITSSKT | PDEVS      |                      |
| Hs.BOLA1   | IRTKLEEALS  | PEVLELRNES  | GGHAVPPGSE | THFRVAVVS  | RFEGLSPLQR  | HLRVHAALAE  | ELGGP----V | HALAIQA-RT | PAQWRENSQ- | LDTSPPCLGG NKKTLGTP  |
| Canis      | IRTKLEQALN  | PEVLELRNES  | DAHAVPPGSE | THFRVAVVS  | RFEGLSPLQR  | HLRVHAALSE  | ELAGR----V | HALAIQT-RT | PAQWKENPQ- | LDMSPPCLGG NKKTRGTP  |
| Bos        | IRTKLEQALN  | PEVLELRNES  | GGHAVPPGSE | THFRVAVVS  | RFEGLSPLQR  | HLRVHAALSE  | ELAGP----V | HALAIQA-RT | PAQWKENPQ- | LDTSACLGG SKKSRN     |
| Apis       | IKKKLIDFLN  | PSYIEVINES  | YMHNVSKGSE | THFKVIVSD  | LFKDKPLIKR  | HQMINKLLEA  | ELQGG----V | HALSIVA-KT | SDQWKDKCN- | ISPSPVCRGG FGK       |
| Drosophila | MRKALNTELK  | PVYLEVINES  | PQHNVPKRSE | SHFRVFVSE  | KFNDLTLIKR  | HLRVNDTVKN  | ALKEAGFEFM | HALSIEA-KT | PKQWEPEQE- | PEKSPCLGG HGK        |
| Dictyostel | IEKLSNQFK   | PIHLDVVNES  | YMHSVPRGSE | THFKVIVSD  | IFNGKSVVAQ  | HLRINDTLKN  | EMKNG---V  | HALSIHC-ST | PDKWDEST-- | ISPSPGCMGG SKKEKQK.. |
| Caenorhabd | LKEKLFAAFQ  | PKHLEVECES  | HLHNVPKGAE | KHFRVQVSD  | EFEGKRVIER  | HLRVNTCLAK  | ELATT----V | HALRIDA-IP | TSKWDGQKQ- | -EDSPTCRGG FGK       |
|            |             |             | 58         | 67         |             | 86          |            | 102        |            |                      |
| Sc.Bol3    | EEKMITDKLQ  | QEL-EPEVCK  | VQDVS-GGCG | SMFAINITSK | KFNGLSLIKQ  | HQLVNRILRD  | DISR-----W | HGLQLTT-KK | STGKGPASS  |                      |
| Ashbya     | EEALITQKLT  | DAL-APGYVK  | VTDVS-GGCG | SMFTIDIRST | HFKGKSMVQQ  | HKLVNRVLAD  | DIKR-----W | HGLQLRT-KA | E          |                      |
| Candida    | YESKIYNILQ  | QEL-NPVLNK  | IKDVS-GGCG | SMFSIFIESE | KFKGLTMIKQ  | HLRVNEILKD  | EIKK-----W | HGLQLRT-KK | V          |                      |
| Yarrowia   | YEKQISQMLT  | DEF-KPVS LD | VRDIS-GGCG | SMFAIQIVSD | KFKGIPMVKQ  | HLRVNALLAD  | EIKQ-----W | HGLQLVT-KA | A          |                      |
| Magnaporth | SETEIWNRLM  | AEF-EPVELV  | VQDIS-GGCG | SMYGIEISSD | KFRGSGMLKQ  | QRMVNKVLAD  | LMKE-----W | HGVQLRT-RV | P          |                      |
| Aspergill  | TPELLKSKLV  | EQL-QAQVVE  | IEDLS-GGCG | QAFQAIIVSP | QFEKKNMLAR  | HLRVNSVLKS  | EIAA-----I | HAWTPKC-YT | PEQWQALQQG | SA                   |
| Neurospora | GEAQVWDILI  | REF-APTNLV  | VRDIS-GGCG | SMYGVDICSE | KFRGLNMLKQ  | QLRVNAALGD  | LVKQ-----W | HGIQIKT-SV | P          |                      |
| Schizosacc | GERRIKDILT  | EKL-SPSSLR  | VIDVS-GGCG | SMYQVAIKSK | AFQ GKNTLAQ | HLRVNSILKE  | EIRN-----M | HGLNLST-EV | EDDISAGGST | TSS                  |
| Hs.BOLA3   | GELRVTTQILK | EKFPRATAIK  | VTDIS-GGCG | AMYEIKIESE | EFKEKRTVQQ  | HQMVNQALKE  | EIKE-----M | HGLRIFT-SV | PKR        |                      |
| Canis      | GELKVTRILK  | EKFPGATAIK  | VTDIS-GGCG | AMYEIQIESE | EFKEKRTVQQ  | HQMVNQALKE  | EIKG-----M | HGLRIFT-SV | PKH        |                      |
| Bos        | AELKVTTQILK | EKFPRATAIK  | VTDIS-GGCG | AMYEIKIESE | EFKEKRTVQQ  | HQMVNQALKE  | EIKG-----M | HGLRIFT-SV | PKH        |                      |
| Apis       | AEQKMISILR  | NKFPKAKLIE  | VNDVS-GGCG | AMFEINVVAP | EFKGLNTIKQ  | HLRLINEALKE | EIKD-----M | HGVRIYT-SV | PES        |                      |
| Drosophila | YDSKYLEEKL  | KRELQTEYVS  | VTDES-DGCG | GKFSAVIVSP | AFSGKTLLQK  | HLRVNSTLAE  | ELKE-----I | HAFSQKS-YT | PEEWEKVKAQ |                      |
| Dictyostel | VEDIEKRLKL  | KFSSEDDKIK  | IIDES-GGCG | AKFLVAIGSS | QFDGVSLLEK  | HLRVNELLEKE | EISQ-----I | HAITLKT-WT | LKQYEEKINT | I                    |
| Caenorhabd | AELKMSKLLT  | EGIDGCTRVE  | VHDVS-NGCG | SMFDVVVEAA | GFKGKSKVAQ  | HKQVTSILRE  | QIKD-----M | HGLTIKT-KA | A          |                      |
|            |             |             | 59         |            |             | 81          |            | 96         |            |                      |
