# Supplementary material for: Mitochondrial Bol1 and Bol3 function as assembly factors for specific iron-sulfur proteins
Source: eLife journal article supplement (doi:10.7554/elife.16673), 2016-08-17
Supplement: supp [file elife-16673-supp-v1.zip]

## Galactose

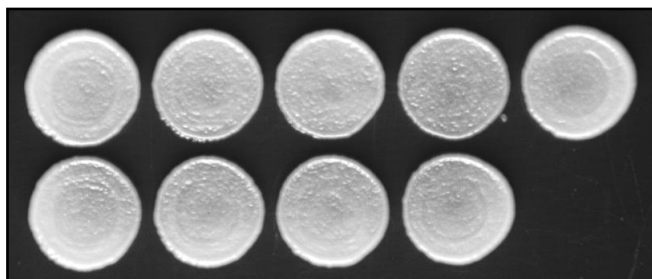

## Glycerol

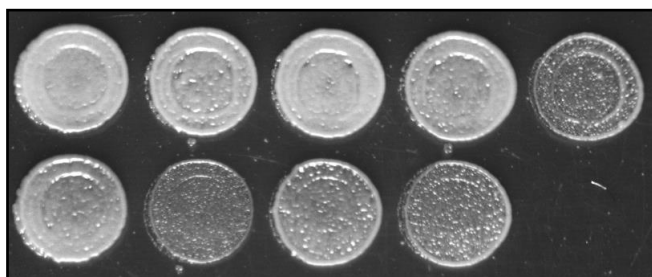

## Acetate

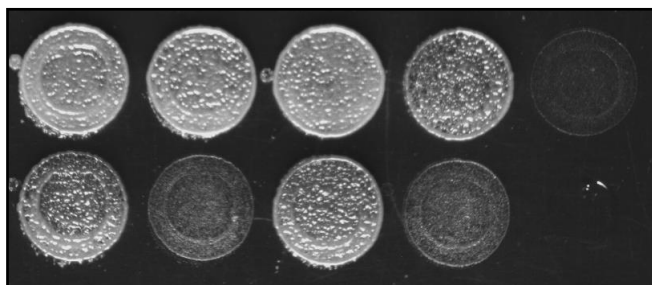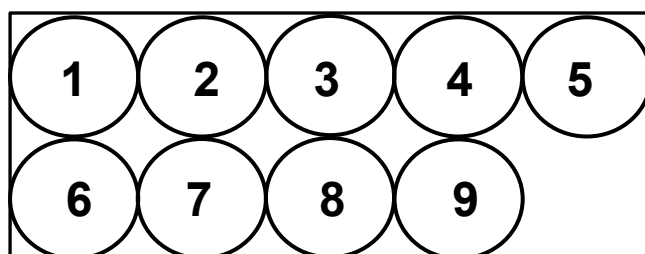

- 1 – WT
- 2 – *bol1* $\Delta$
- 3 – *bol2* $\Delta$
- 4 – *bol3* $\Delta$
- 5 – *nfu1* $\Delta$
- 6 – *bol12* $\Delta$
- 7 – *bol13* $\Delta$
- 8 – *bol23* $\Delta$
- 9 – *bol123* $\Delta$
