# Supplementary figures and images for: Mitochondrial Bol1 and Bol3 function as assembly factors for specific iron-sulfur proteins
Source: eLife journal article supplement (doi:10.7554/elife.16673), 2016-08-17

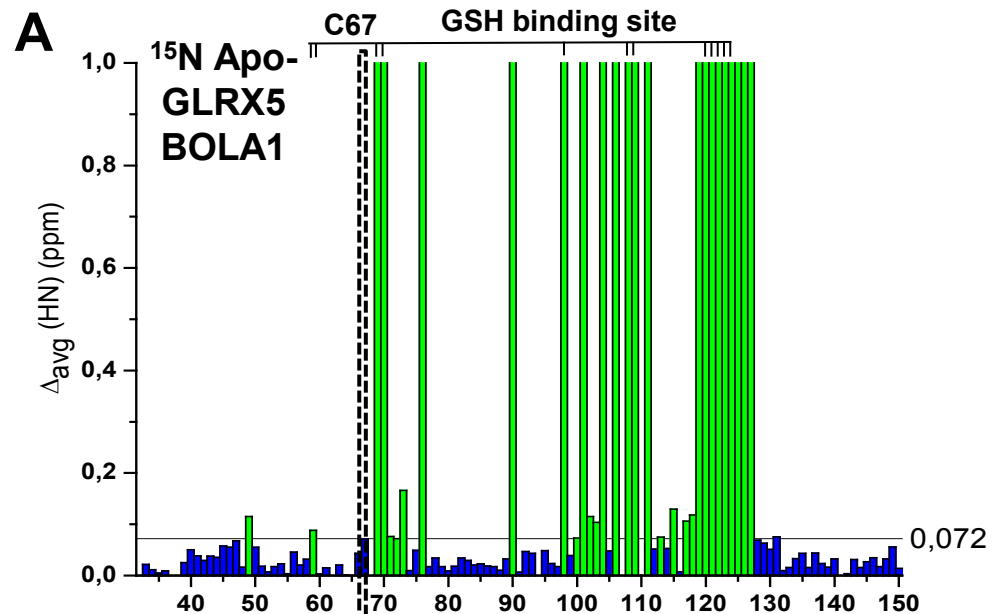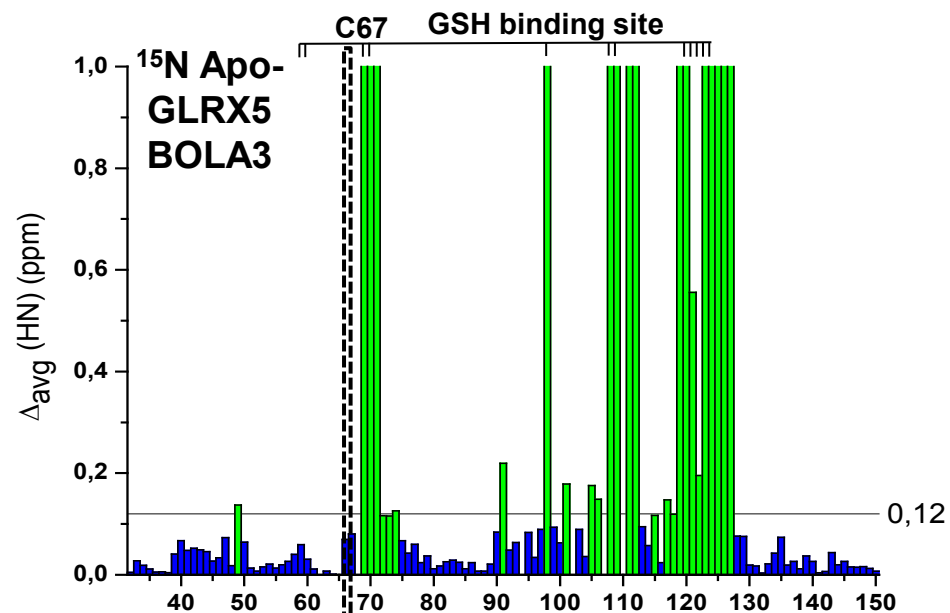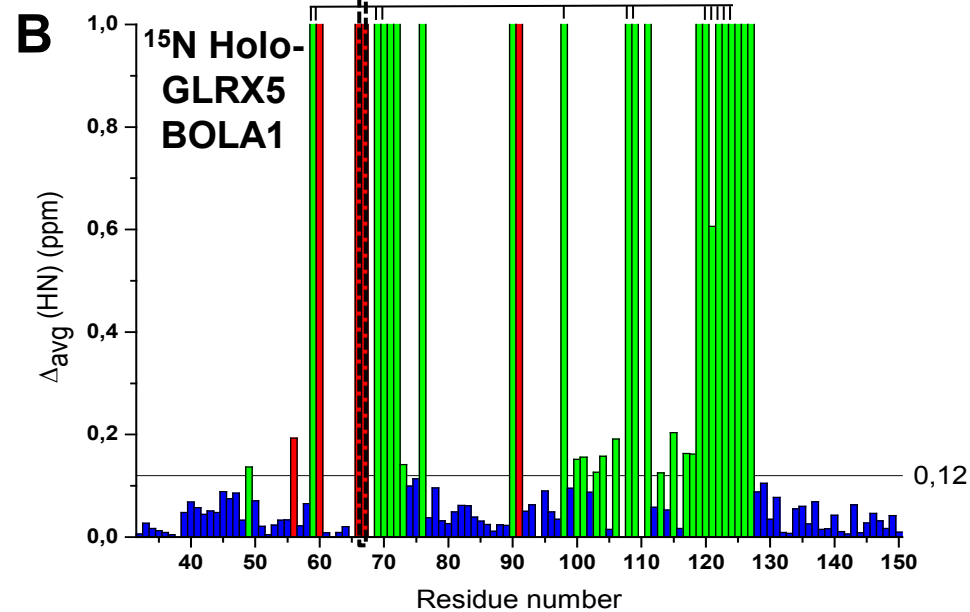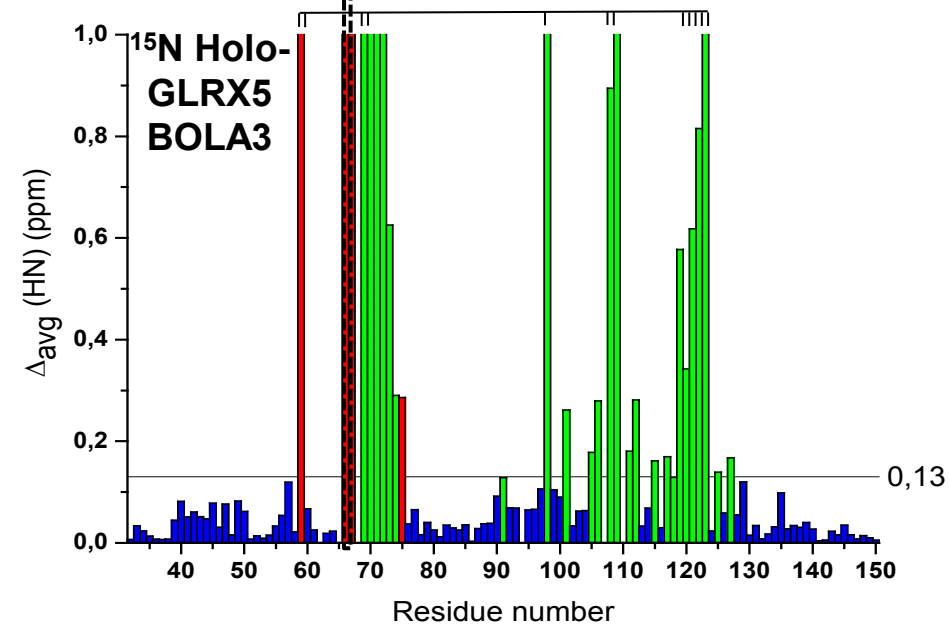

Supplement: supp [file elife-16673-supp-v1.zip]

**A** AtGrxS14

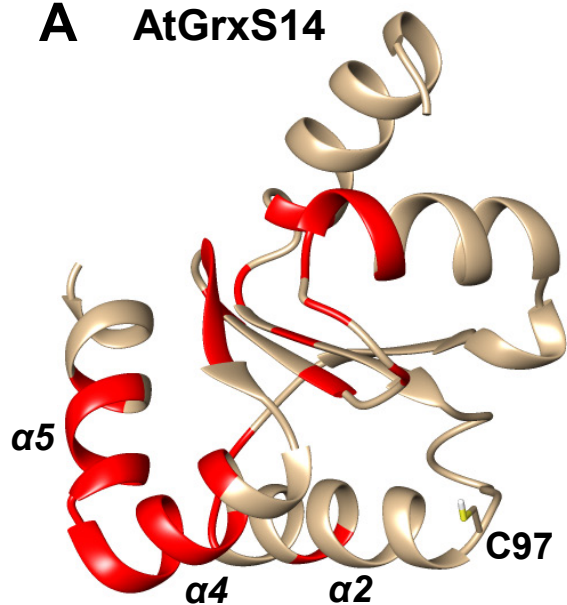

**GLRX5**

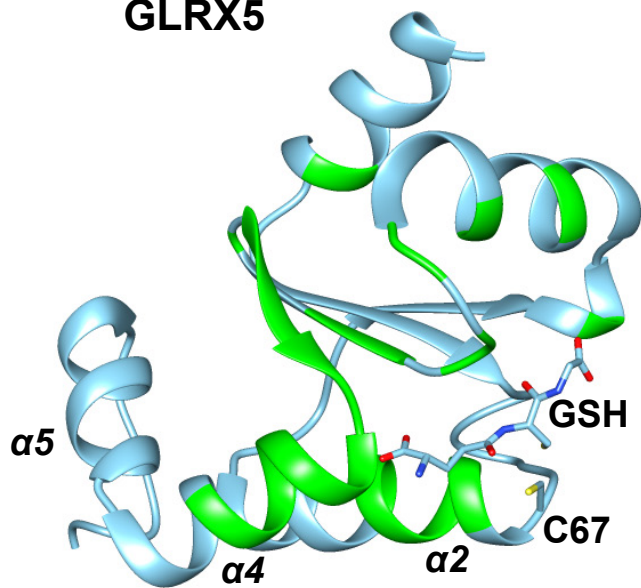

**B**

**AtBoIA2**

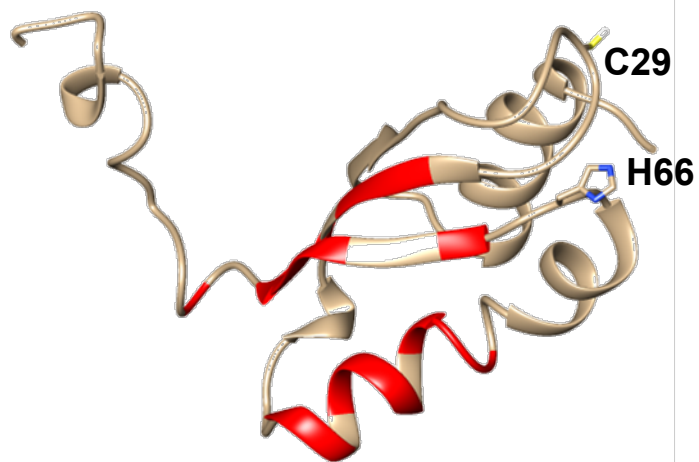

**BOLA3**

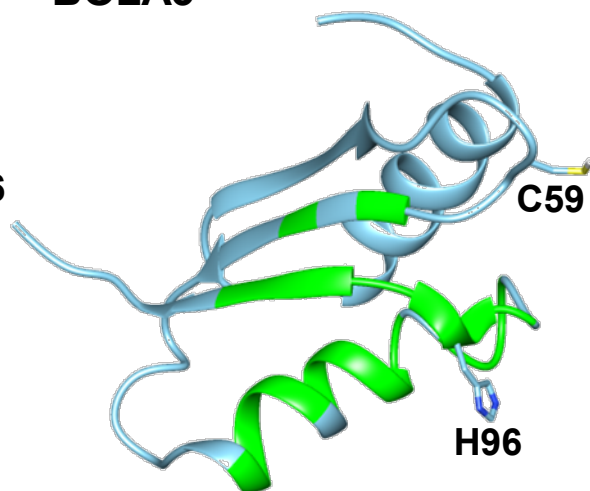

Supplement: supp [file elife-16673-supp-v1.zip]

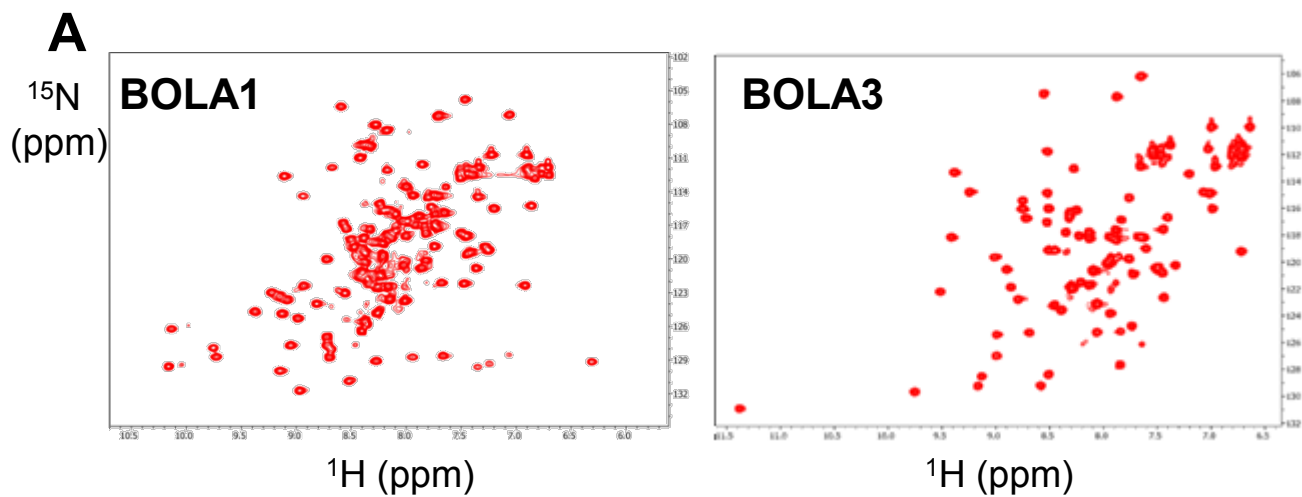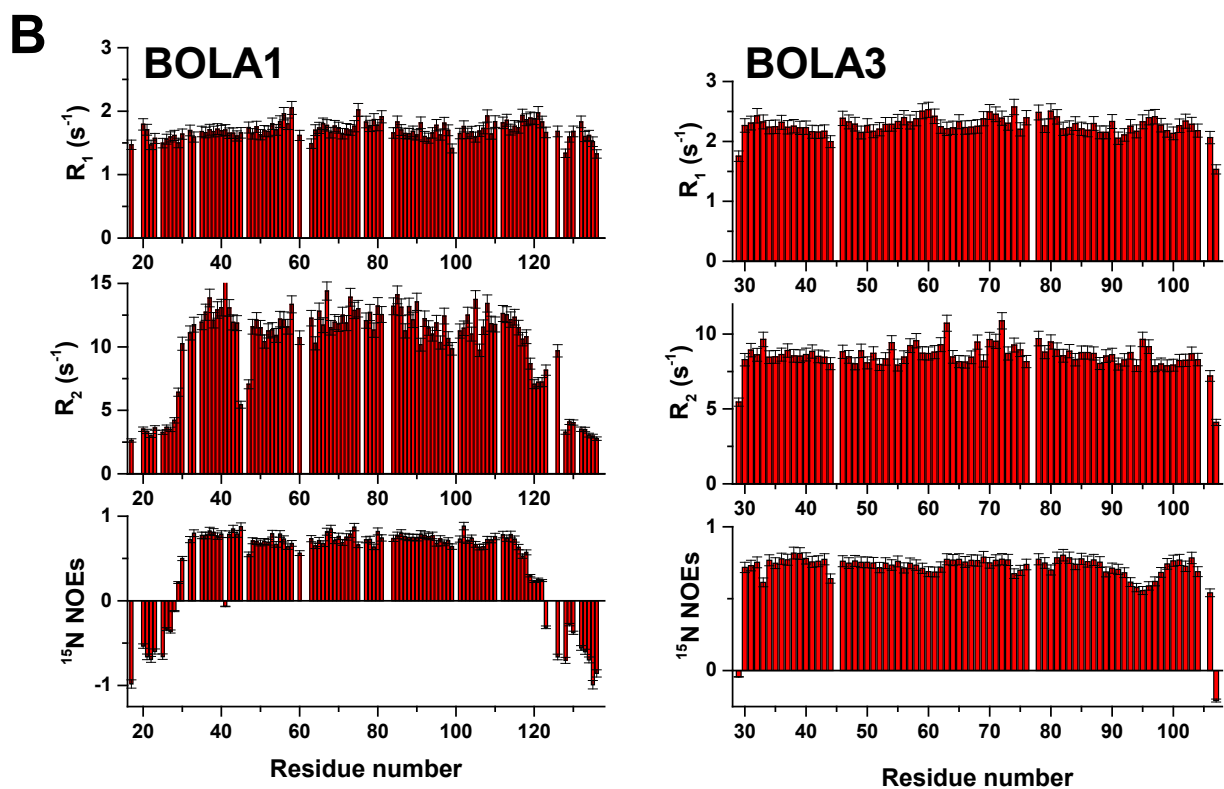

Supplement: supp [file elife-16673-supp-v1.zip]

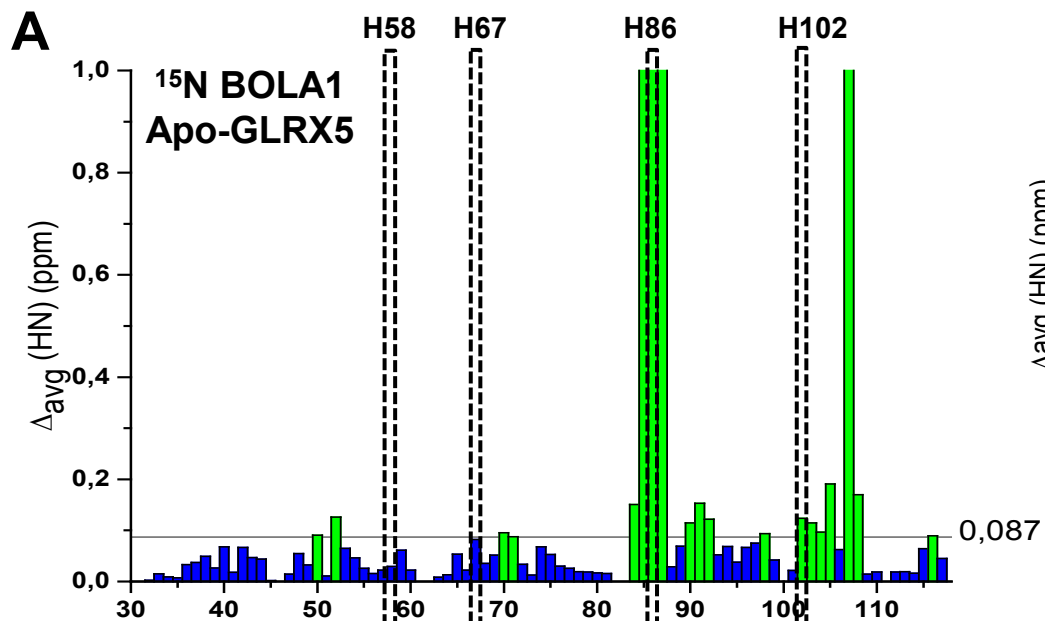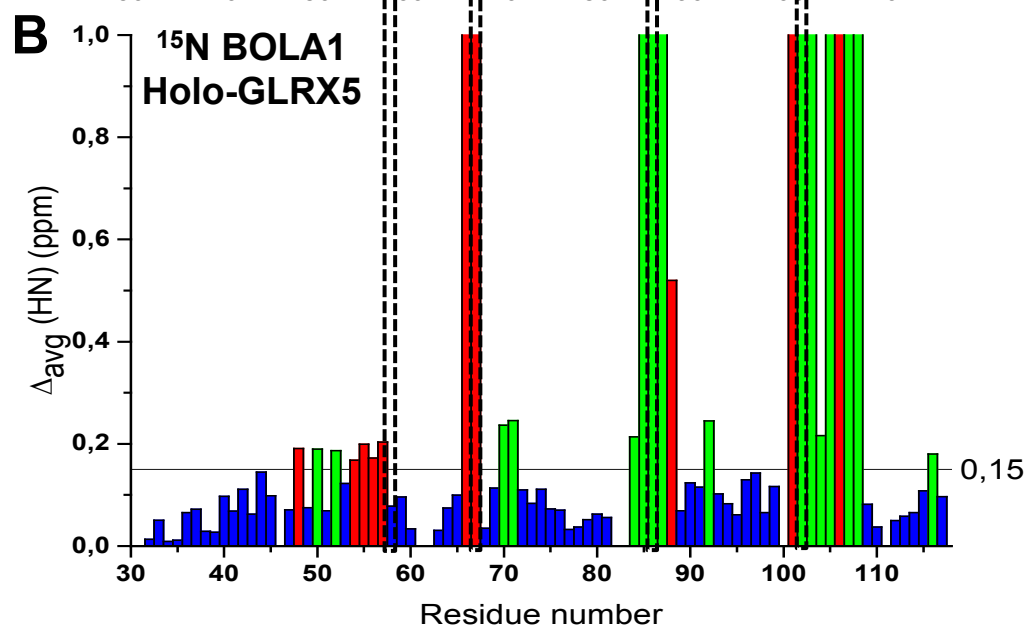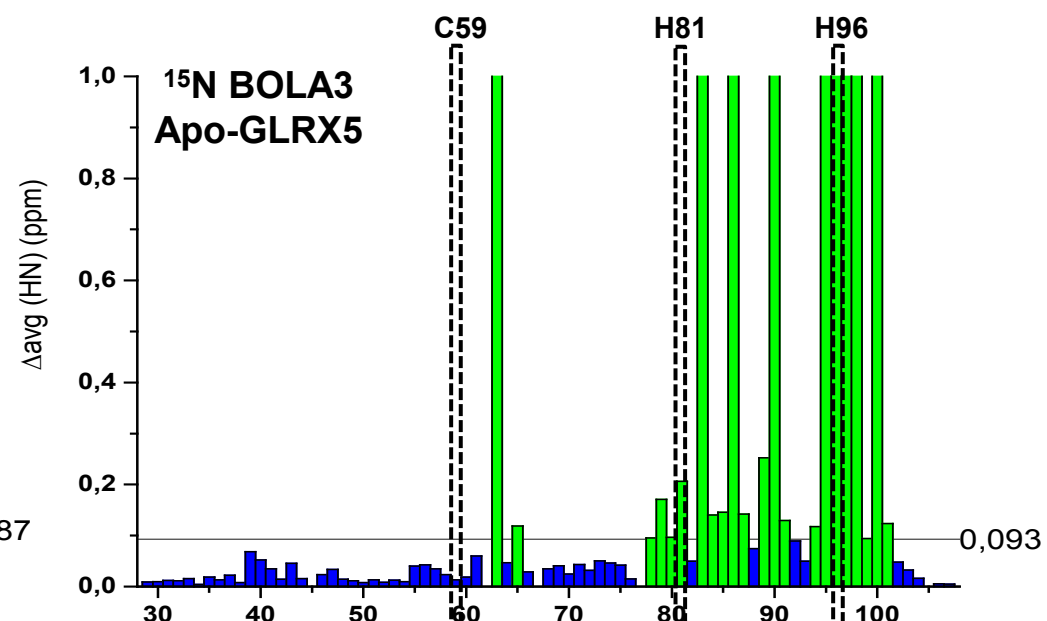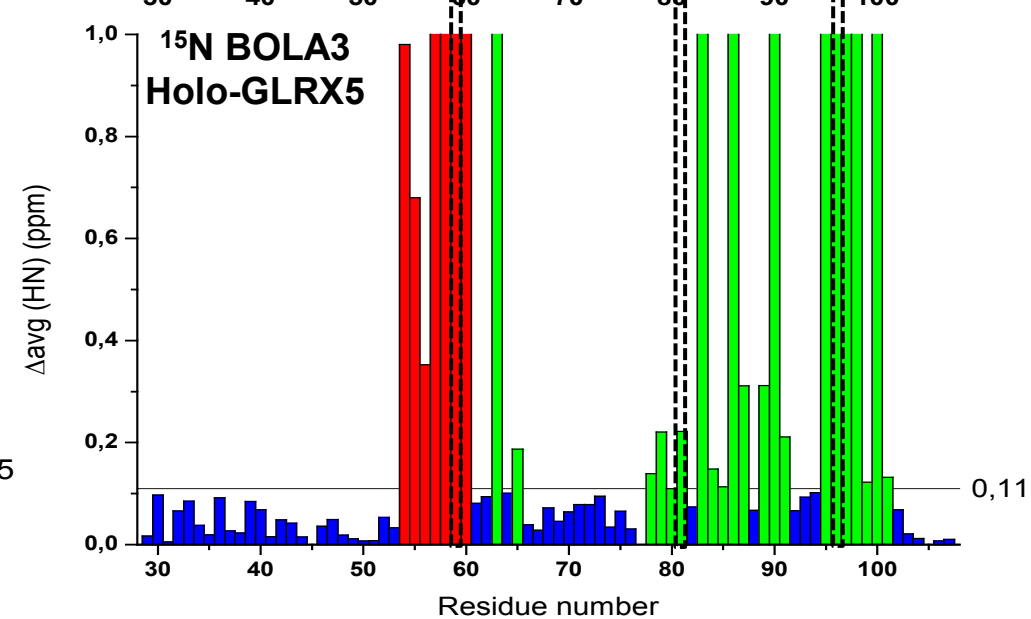

Supplement: supp [file elife-16673-supp-v1.zip]

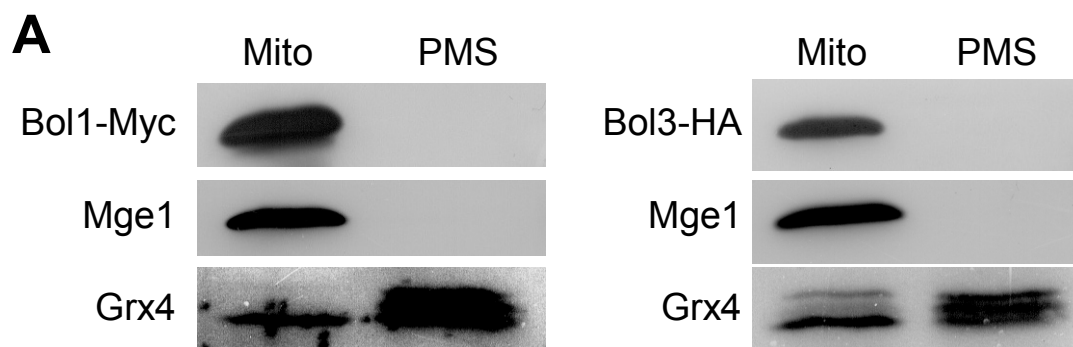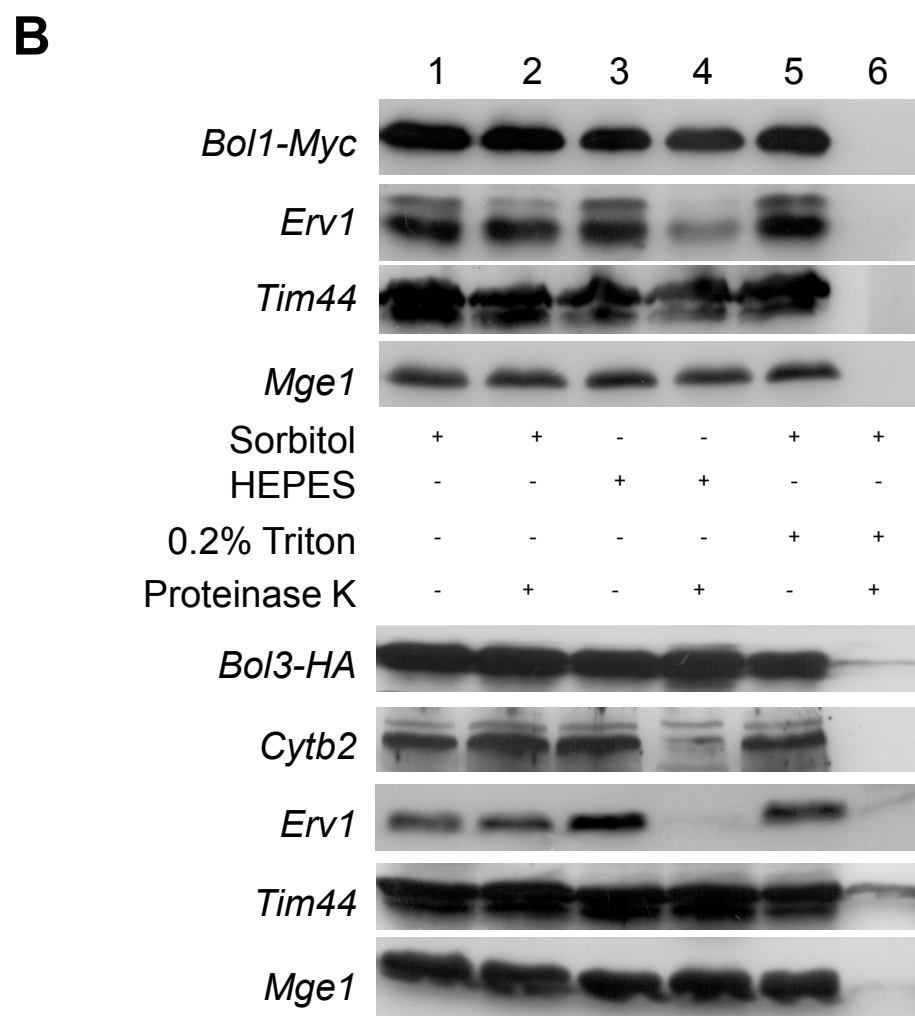

Supplement: supp [file elife-16673-supp-v1.zip]

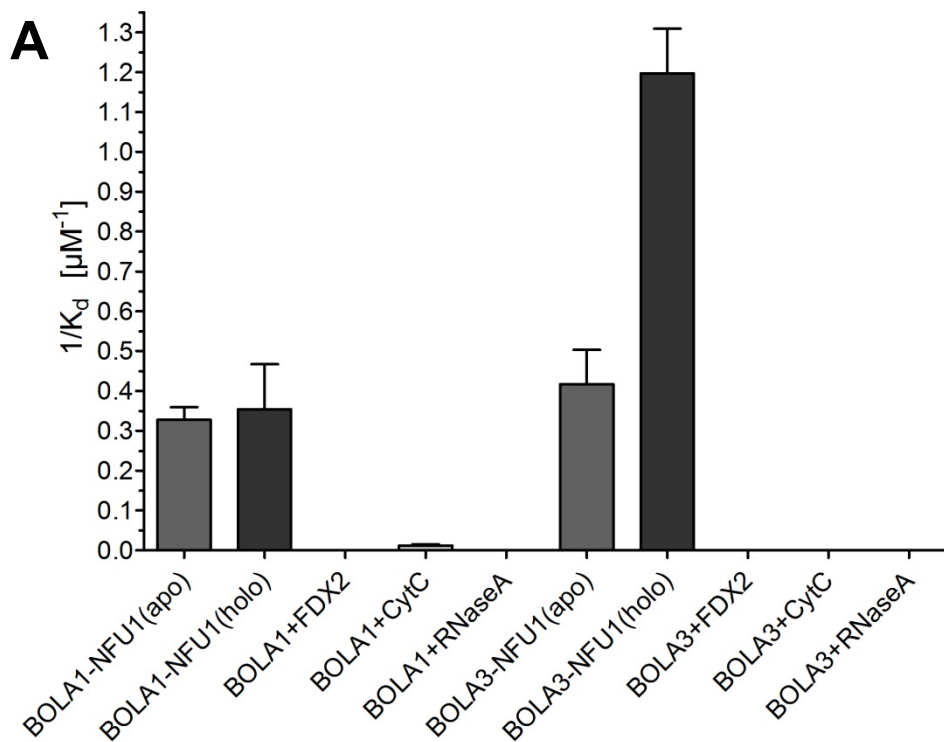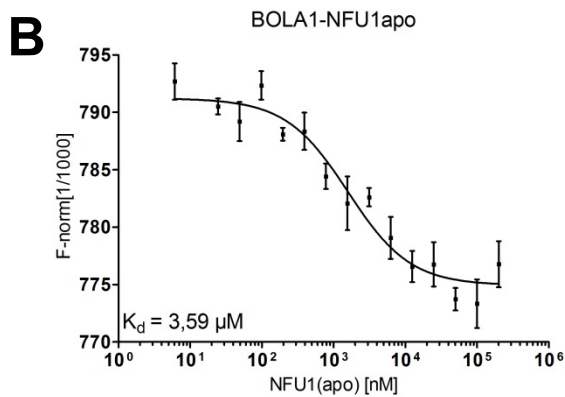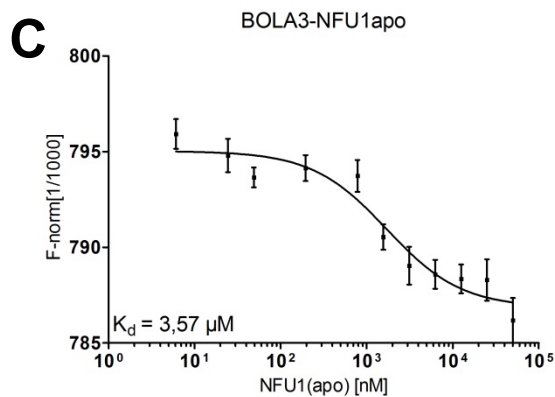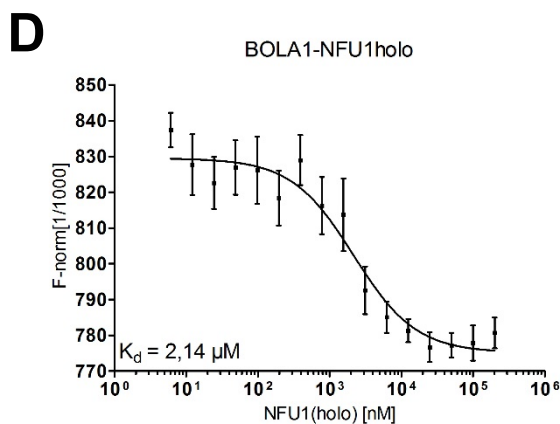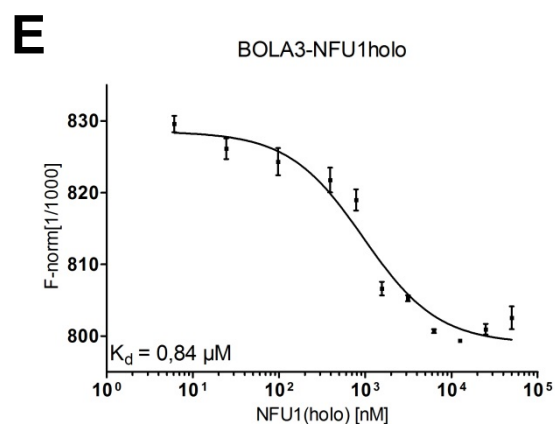

Supplement: supp [file elife-16673-supp-v1.zip]

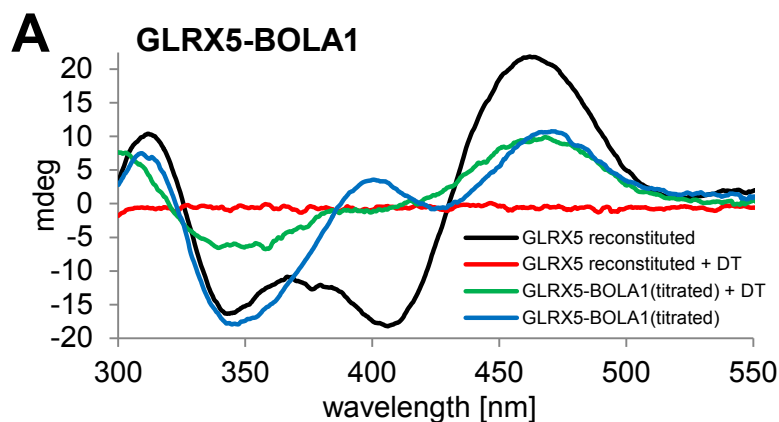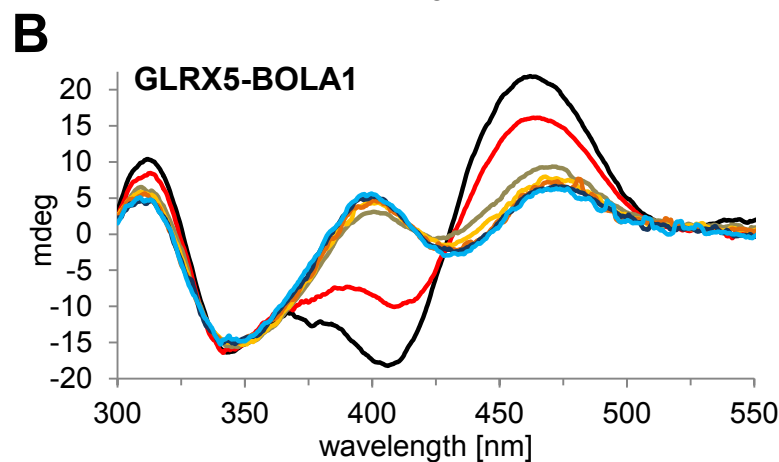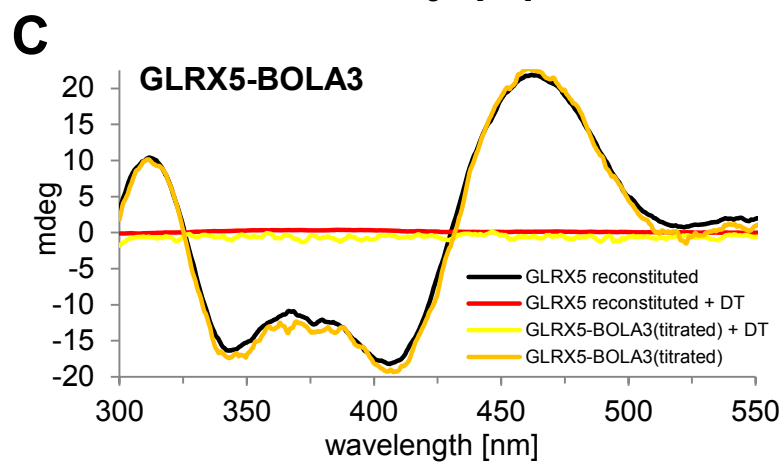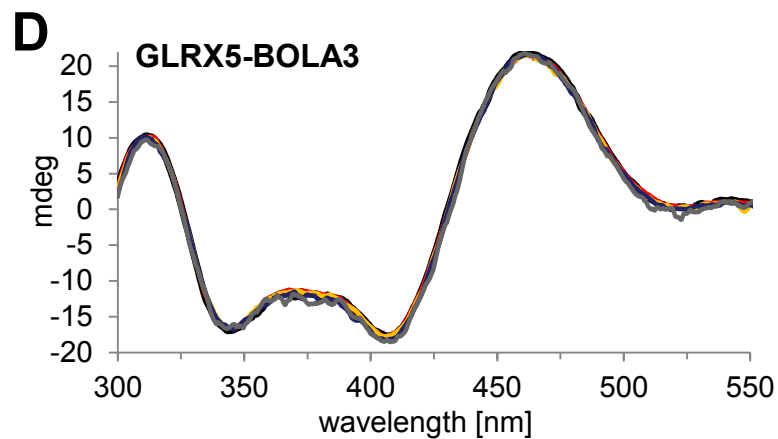

Supplement: supp [file elife-16673-supp-v1.zip]

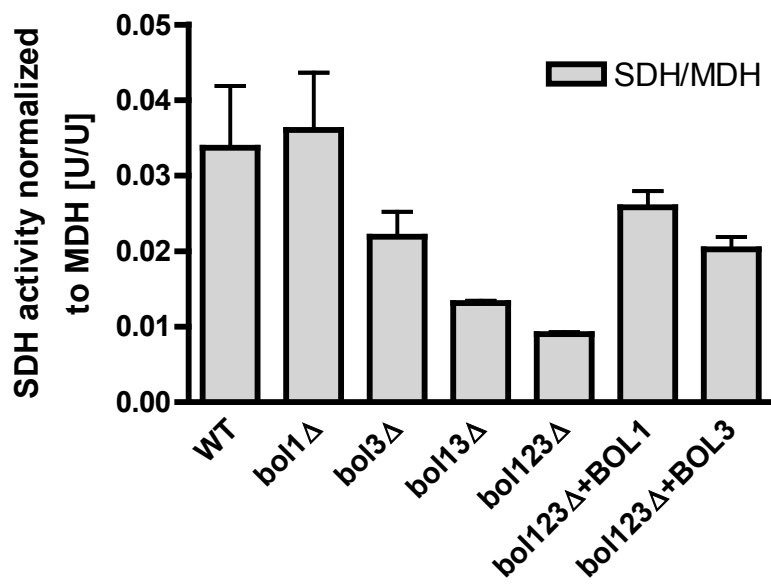

Supplement: supp [file elife-16673-supp-v1.zip]

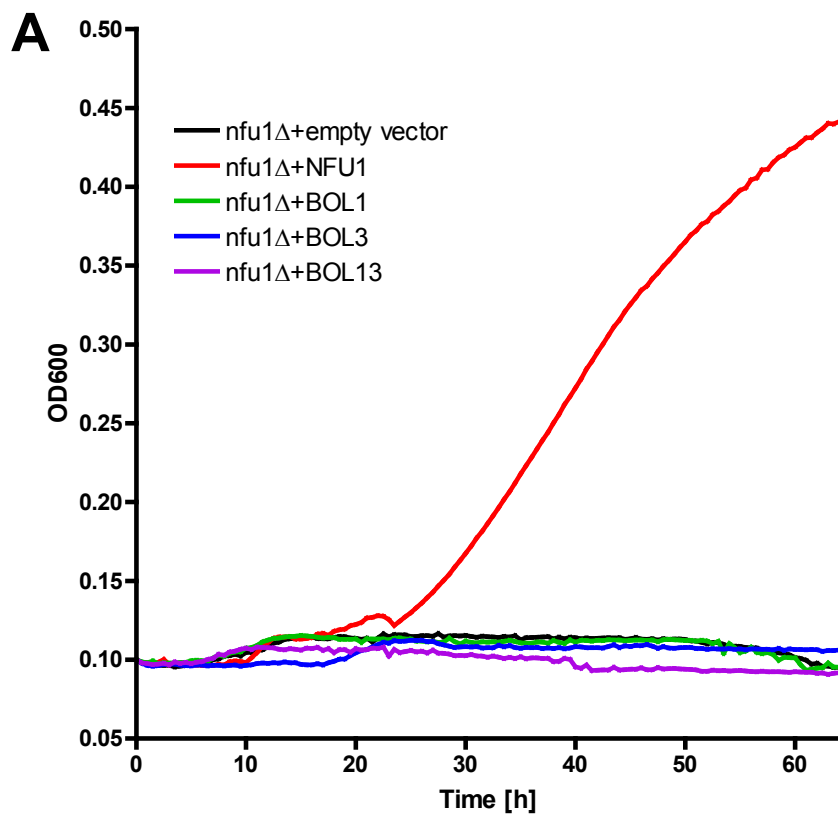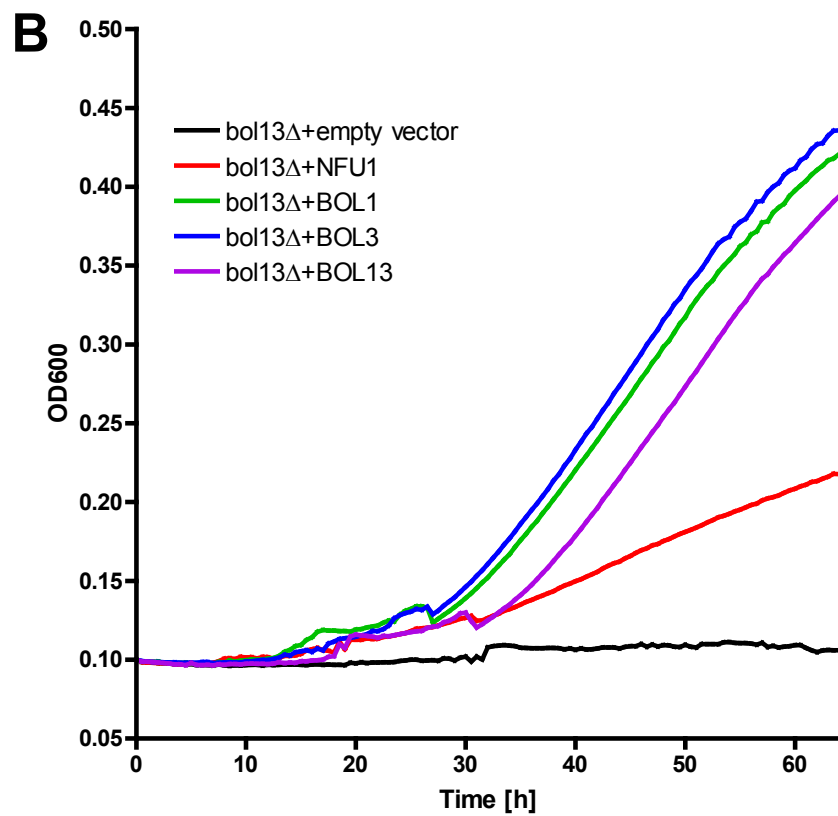

Supplement: supp [file elife-16673-supp-v1.zip]

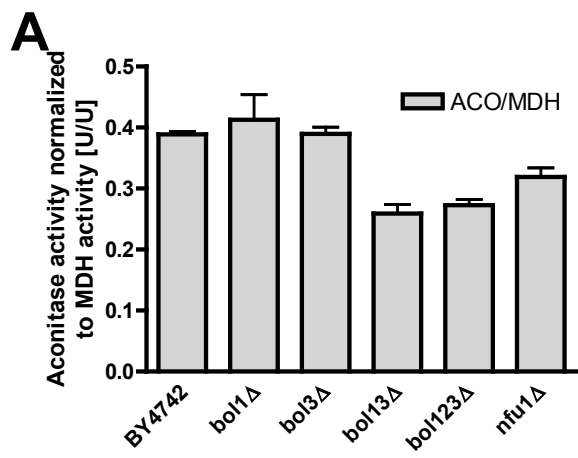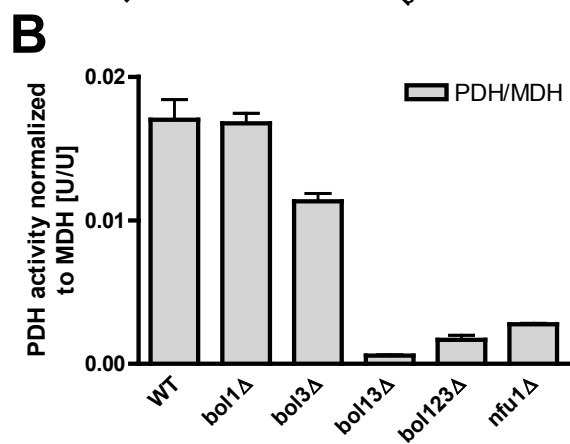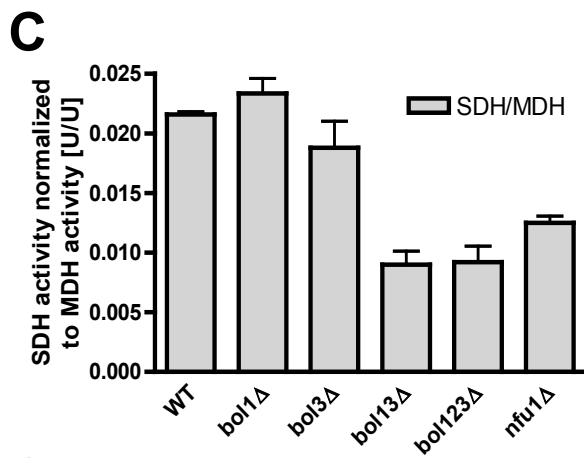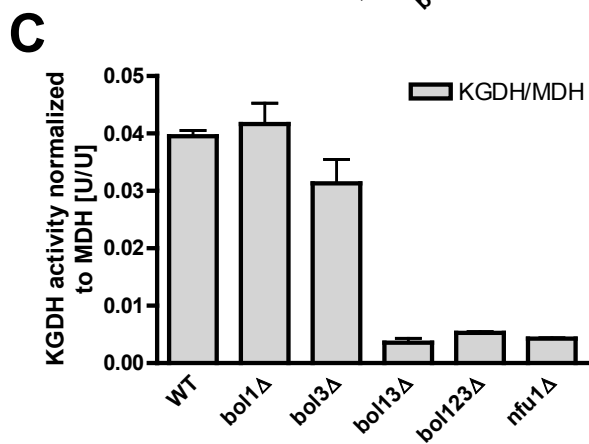

Supplement: supp [file elife-16673-supp-v1.zip]

**A**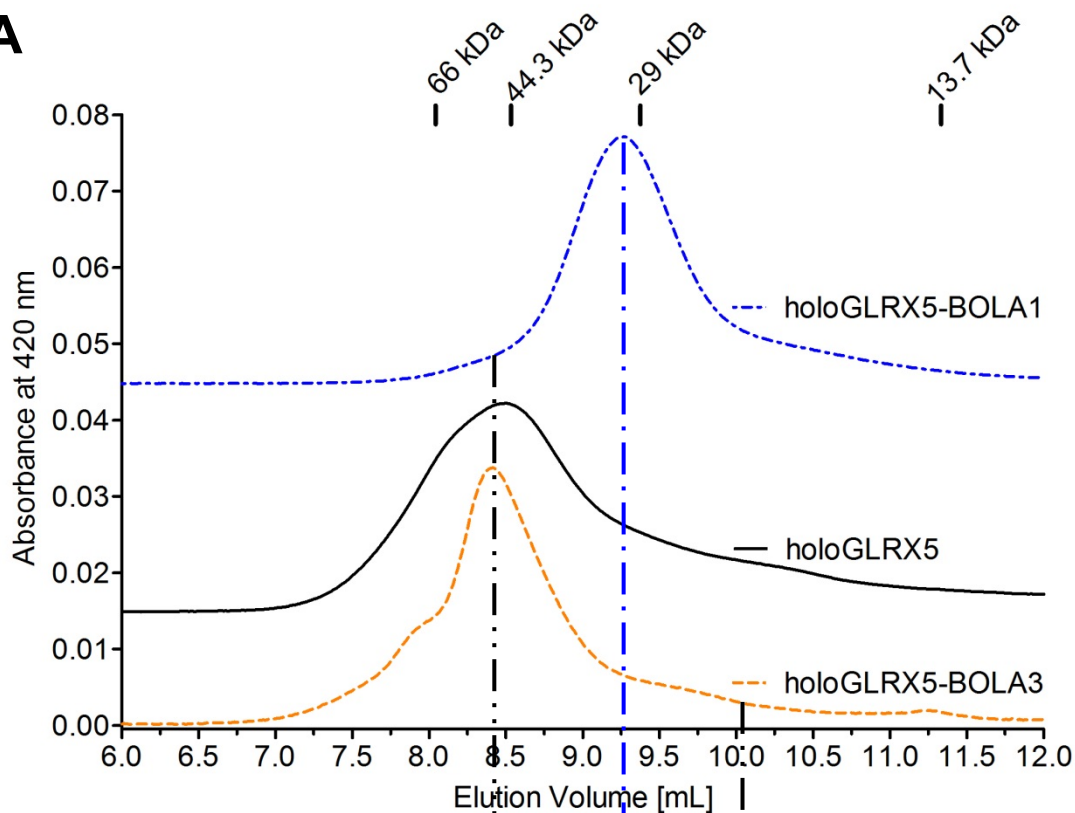**B**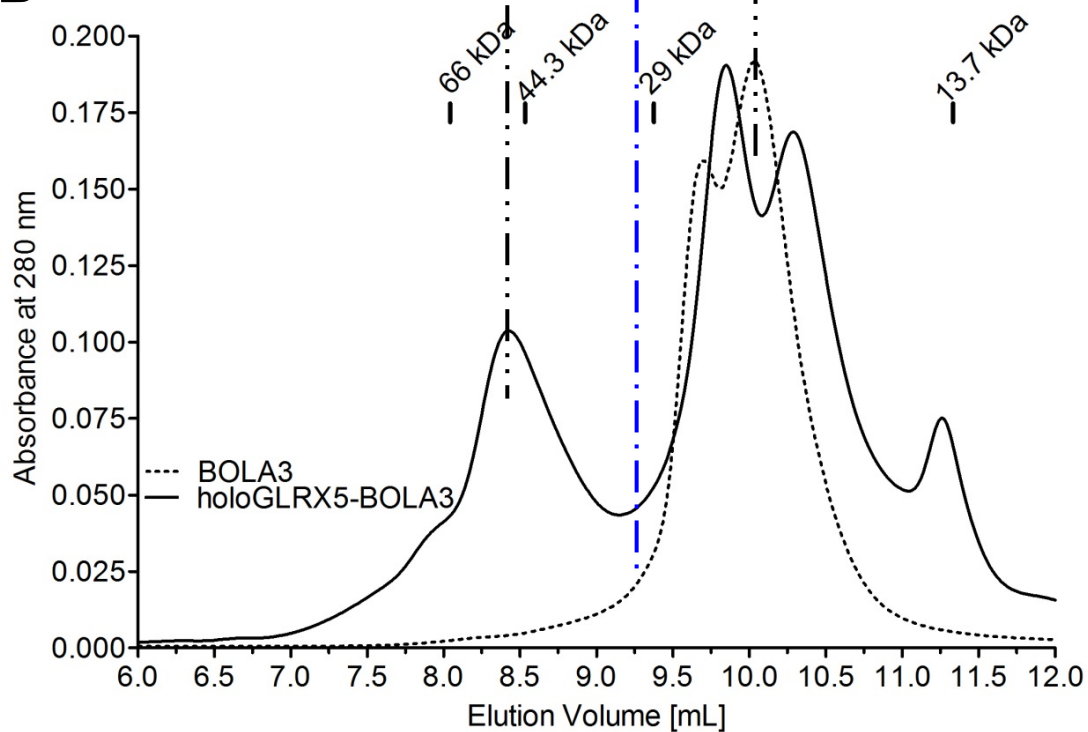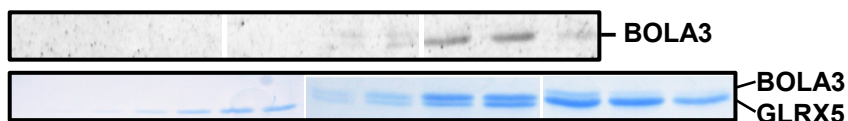

Supplement: supp [file elife-16673-supp-v1.zip]
